# Supplementary material for: Solution–solid growth of α-monoclinic selenium nanowires at room temperature
Source: Royal Society of Chemistry journal article supplement (doi:10.1039/b209399e), 2002-12-11
Supplement: b209399e.doc [file b209399e.doc]

**A Solution-Solid Growth of α-monoclinic Selenium Nanowires at Room Temperature**

**Authors: Xueyun Gao, Tao Gao, and Lide Zhang**


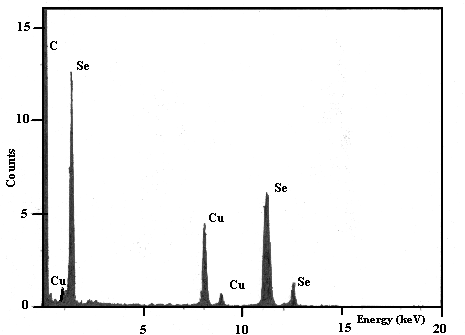


EDS spectrums of α-monoclinic selenium nanowires. The experiments were carried out on a JEOL 2010 High-Resolution Transmission Electron Microscope (HRTEM) equipped with an Oxford Link ISIS Energy Dispersive Spectrometry (EDS) System working with an accelerating voltage at 200keV.
